# Machine learning-based prediction of depression severity among medical students

Dianhao Liu<sup>a</sup>; Zequn Chen<sup>a</sup>; Wesley J. Marrero<sup>a\*</sup>; Thomas Thesen<sup>b</sup>

<sup>a</sup> Thayer School of Engineering, Dartmouth College, Hanover, NH, USA

<sup>b</sup> Department of Medical Education, Geisel School of Medicine, Dartmouth College

**\*Corresponding author:** Wesley J. Marrero

[wesley.marrero@dartmouth.edu](mailto:wesley.marrero@dartmouth.edu)

Phone: (603) 646-3457

Address: 15 Thayer Dr, Hanover, NH 03755

**Dianhao Liu;** [dianhao.liu.th@dartmouth.edu](mailto:dianhao.liu.th@dartmouth.edu); (603) 646-3457; 15 Thayer Dr, Hanover, NH 03755

**Zequn Chen;** [zequn.chen.th@dartmouth.edu](mailto:zequn.chen.th@dartmouth.edu); (603) 646-3457; 15 Thayer Dr, Hanover, NH 03755

**Wesley J. Marrero;** [wesley.marrero@dartmouth.edu](mailto:wesley.marrero@dartmouth.edu); (603) 646-3457; 15 Thayer Dr, Hanover, NH 03755

**Thomas Thesen;** [thomas.thesen@dartmouth.edu](mailto:thomas.thesen@dartmouth.edu); (603) 646-5888; 1 Rope Ferry Rd, Hanover, NH 03755

## Abstract

Depression is a significant global cause of disability, yet it often remains undetected and untreated. Medical students have a higher likelihood of experiencing depression compared to many other age-matched groups. Previous studies have shed light on factors contributing to depression among college students. However, medical students face understudied unique experiences and demands. This gap hinders the ability to apply previously developed models to predict depression in medical students, limiting the effectiveness of mental health interventions in this population. Our study addresses this gap by presenting a machine learning model that captures the complex interplay of factors influencing the severity of depression in this population. Using data from the Healthy Minds Study, we found that a sequence of binary XGBoost models performed best at predicting the severity of depression as recorded through the Patient Health Questionnaire-9. Our modeling approach identified that prior diagnosis of depression and eating disorder, current financial stress, and younger age had the highest influence on predicted depression severity. The findings of this study hold great promise for enhancing medical education by more effectively addressing students' depression. Our predictive model may enable educators and administrators to identify students at higher risk, facilitating timely interventions and support.

## 1. Introduction

Depression is a significant global cause of disability, yet it often remains undetected and untreated.<sup>1</sup> Medical students have a higher likelihood of experiencing depression compared to many other age-matched groups.<sup>2,3</sup> Starting in medical school, students confront an increased risk of depression, a pattern that persists and increases through each stage of medical training and into medical practice.<sup>2</sup> This is often accompanied with an increase in relationship and substance abuse issues.<sup>2,4</sup>

Previous studies have shed light on factors contributing to depression among college students.<sup>5</sup> Some common factors highly correlated with depression are: smoking<sup>6</sup>, diminished social contact<sup>7</sup>, adverse childhood experiences<sup>8</sup>, poor academic performance<sup>9</sup>, lack of financial resources and support<sup>10</sup>, and daytime drowsiness.<sup>11</sup> However, medical students face understudied unique experiences and demands.<sup>12</sup> This gap hinders the ability to apply previously developed models to predict depression in medical students, limiting the effectiveness of mental health interventions.

Aiming to address this knowledge gap, this article adopts a novel approach to build predictive models of depression tailored to medical students. By integrating diverse variables and employing machine learning techniques, our study presents the development of a comprehensive model that captures the complex interplay of factors influencing the severity of depression in this population. Our approach promises to provide a deeper understanding of the critical predictors of depression, paving the way for tailored mental health support and interventions to enhance the well-being and academic performance of medical students.

The organization of this paper is as follows: firstly, the methodology section details the novel approach and predictive model construction, encompassing data collection, variable selection, and statistical analysis techniques. The results obtained from the predictive models are presented and interpreted, emphasizing the key factors influencing depression scores among

medical students. A thorough discussion of the study's findings, their implications, limitations, and recommendations for future research and mental health interventions for medical students follows. Finally, the conclusion provides a concise summary of the paper's contributions and their potential impact on promoting mental well-being among medical students.

## **2. Methods**

### **2.1 Study population**

The study population for this research is built upon the Healthy Minds Study (HMS) performed by the Healthy Minds Network, a nonprofit organization dedicated to mental health issues among college students in the United States.<sup>13</sup> Our dataset encompasses the mental health and demographic information of undergraduate and graduate students from various universities in the United States, spanning the academic years 2009-2022. Within the dataset, depression scores ranging from 0 to 27 are assigned to each student, based on their responses to Patient Health Questionnaire-9 (PHQ-9). Any samples lacking depression scores are excluded from this study.

### **2.2 Factors and response variables**

The HMS dataset comprises numerous variables, many of which are poorly associated with depression. Including all these variables in the model may significantly increase computational burden and impede the interpretation of variables' effects. To address these concerns, we include variables in our models based on their relative importance in predicting depression.

For categorical input data, two commonly employed model agnostic variable importance methods are the chi-square statistic and the mutual information statistic.<sup>14</sup> In this dataset, several

variables are highly correlated, rendering the chi-square method unsuitable as it assumes independence between variables. Consequently, we assess the association between each variable and depression using the mutual information criterion. The scores derived from the mutual information criterion signify the degree of information shared between each variable and a response variable. Higher scores indicate a stronger relationship between the variable and depression. We empirically choose a threshold value representing a significant leap in mutual information scores to select the variables included in our model. Variables derived from depression (e.g., "Have you ever lost interest in things you liked for two weeks?") are excluded from this analysis.

The degree of depression in the HMS dataset is recorded on a scale from 0 to 27.<sup>13</sup> We use the depression score directly as an ordinal response variable (i.e., higher scores represent more acute depression levels) to model the severity of depression.

## **2.3 Data preprocessing**

The HMS database consists of a small fraction of medical students, a small number of medical students with higher depression scores can affect the accuracy of predictive models, because the model cannot capture sufficient information from small dataset. To address this issue, we consider the enhancement of the medical student training set with other graduate students and the general (undergraduate and graduate) student population. That is, three different training sets are used: the medical student training set, graduate student training set, and general student training set. To maintain the accuracy of the prediction results, the test set only includes medical students without any controlled cluster sampling.

## 2.4 Algorithms and model evaluation

To obtain an ordinal classification model with high predictive accuracy, we employ and compare the performance of various machine learning algorithms. Specifically, evaluate the ordinal extensions of binary classification models commonly used algorithms in the mental health literature.<sup>15-19</sup> We first build an ordinal logistic model and a support vector ordinal regression model to predict the severity of depression.<sup>20</sup> Since most machine learning models have been developed for binary tasks, we use the approach by Frank and Hall to convert our ordinal problem into a sequence of binary classifications.<sup>21,22</sup> This conversion allows us to assess the performance of XGBoost and neural networks, two widely used algorithms in the mental health literature.<sup>23,24</sup> Lastly, a multinomial logistic regression model is developed to predict depression scores as if they were unordered categories for comparison purposes.<sup>21</sup>

As shown in Figure 1, five-fold cross-validation is used to prevent overfitting by tuning and evaluating the models multiple times on different training and validation datasets, respectively.<sup>25</sup> This approach ensures that our models do not excessively fit the training data during their tuning process.

We assess our multi-class (i.e., ordinal, and multinomial) models using the mean absolute error (MAE) of its predictions, which represents the average absolute difference between predicted values and actual observations. A model demonstrating consistent low MAE across different validation sets in our cross-validation framework indicates suitability for generalizing to previously unseen data. The MAE among models across the cross-validation framework are statistically compared using Wilcoxon rank-sum tests with the Bonferroni correction. The best-performing multi-class model is used to estimate the severity of depression in the test set. The overall significance level of our statistical analyses is set to 0.05.

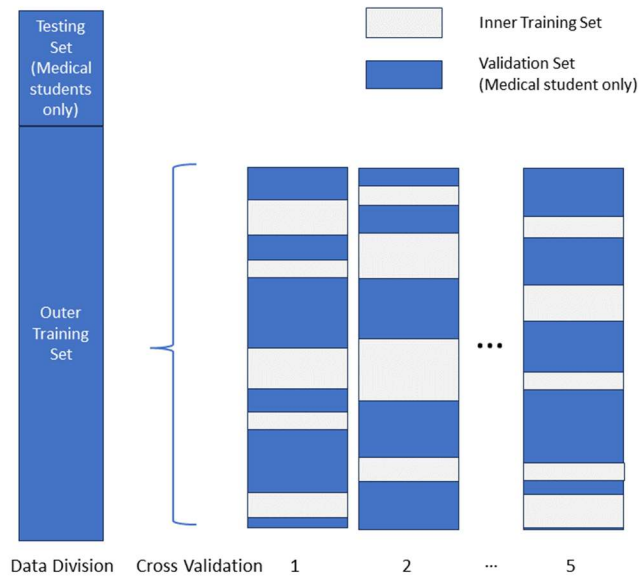

Figure 1. Initial data division and Monte Carlo cross-validation process.

## 2.5 Variable importance and partial dependence

We use model-dependent variable importance metrics to measure the relative contribution of each feature to the best-performing model's predictions. Permutation importance is employed, involving the shuffling of single variable values while keeping the remaining variables values as before.<sup>26</sup> A noticeable gap in MAE between the original and shuffled input shows a factor plays an important role in the predictive model.

To get a clearer picture of how changes in variables affect the output of the best-performing model, we use partial dependence analysis.<sup>27</sup> This analysis offers visualizations of the influence of specific variables on our model's predictions, while holding other variables constant. After selecting variables with high importance, we systematically vary their values. The resulting predictions from our trained models are plotted against the corresponding variable values, enabling us to observe trends and relationships.

### 3. Results

#### 3.1 Descriptive results

The records from 2009 to 2021 contain information of 484,653 students, including 171,800 (35.45%) graduate students and 4,923 (1.02%) medical students. Following the definition from the Healthy Minds Network for depression (i.e., a PHQ-9  $\geq$  14),<sup>13</sup> the number of individuals with depression is 72,059 (14.87%) among all students, 17,453 (3.60%) among graduate students, and 319 (0.07%) among medical students. Figure 1 and Supplemental Figure 1 show the distributions of the number of overall students and students with depression by year, respectively. Supplemental Table 1 in the Appendix displays the demographic as well as physical and mental health characteristics of the students recorded. We select 19 variables with a mutual information score above a 10% importance threshold. Supplemental Table 2 presents a full listing of students' characteristics.

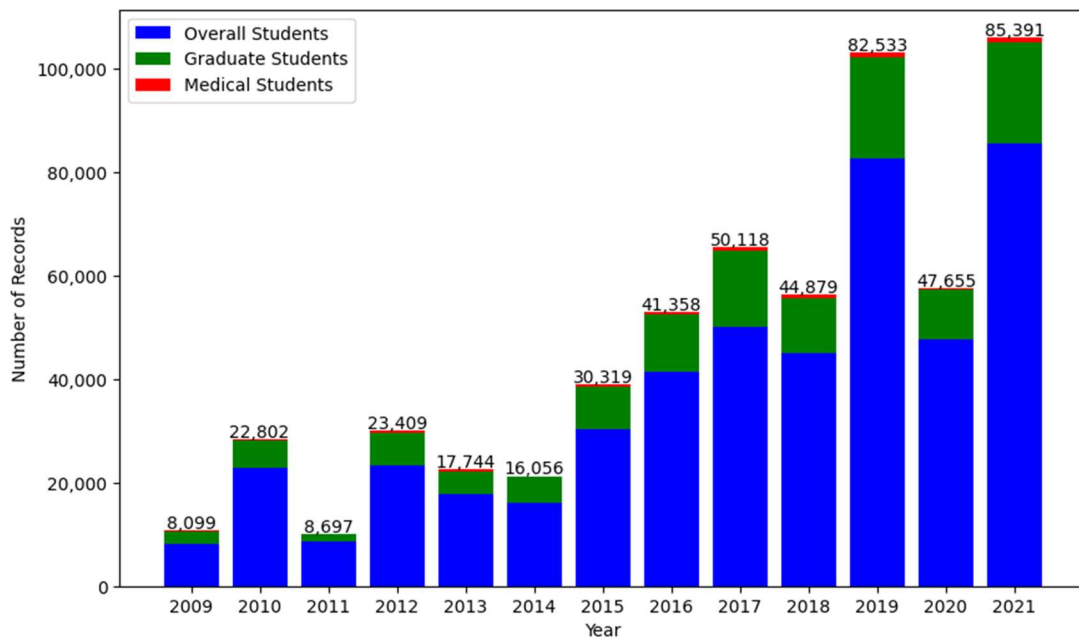

Figure 2. Number of records included in different years.



### 3.3 Multi-class model evaluation

Based on the various training sets and algorithms considered, 27 different models are trained to predict depression severity. The performance of our ordinal models on the cross-validation framework is presented in Figure 3. We find that ordinal logistic regression and support vector ordinal regression perform significantly better than the multinomial logistic regression ( $p < 0.0001$ ). Moreover, the sequence of binary XGBoost models outperformed the remaining models (95% CI, 3.08 to 3.39,  $p < 0.0024$ ). The Wilcoxon rank-sum test with the Bonferroni correction across all pairs of models are shown in Supplemental Table 3 of the Appendix. Our best-performing method, the sequence of binary XGBoost models, presents an MAE of 3.32 when trained in the outer training set and applied to the test set.

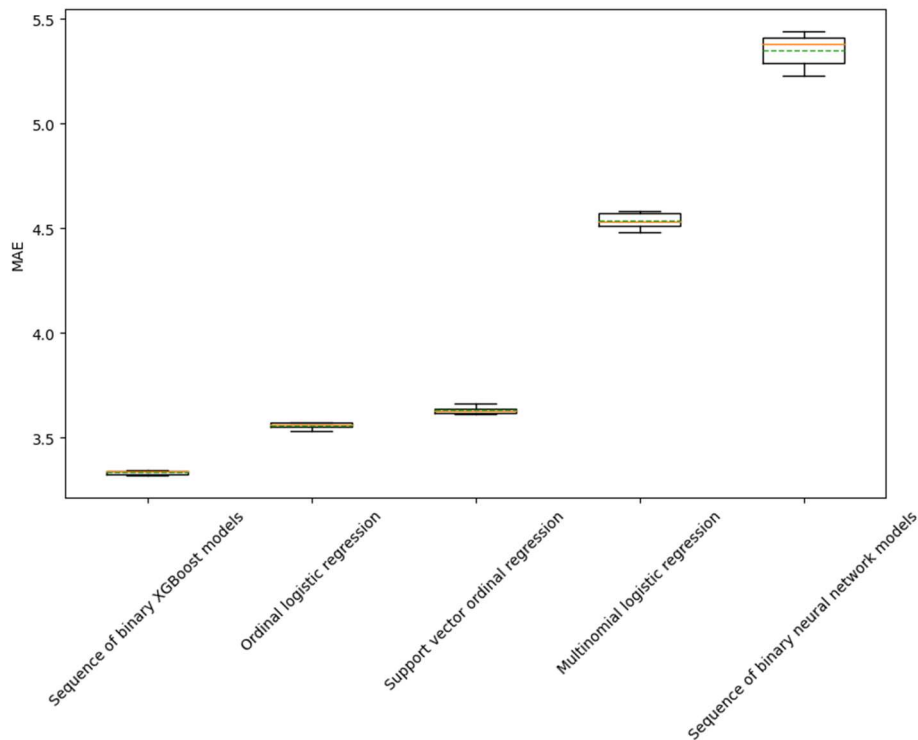

Figure 3. MAE of potential multi-class models to predict overall depression.

### 3.4 Variable importance

We analyze the importance of variables in our sequence of binary XGBoost models since it has the highest accuracy. Our variable importance results in Figure 4 reveal that history of depression has the highest influence on predicted depression severity. Other notable factors include eating disorder (SCOFF<sup>28</sup> score), financial status, and age group. Figure 5 shows the marginal impact of different levels of each of the four most important variables (i.e., variables with an importance score of at least 10%) on the predicted depression score with partial dependence plots. The rest of the partial dependence plots are shown in Supplemental Figure 2. History of depression, higher SCOFF scores, lower financial status, and younger age are strongly associated with higher depression scores.

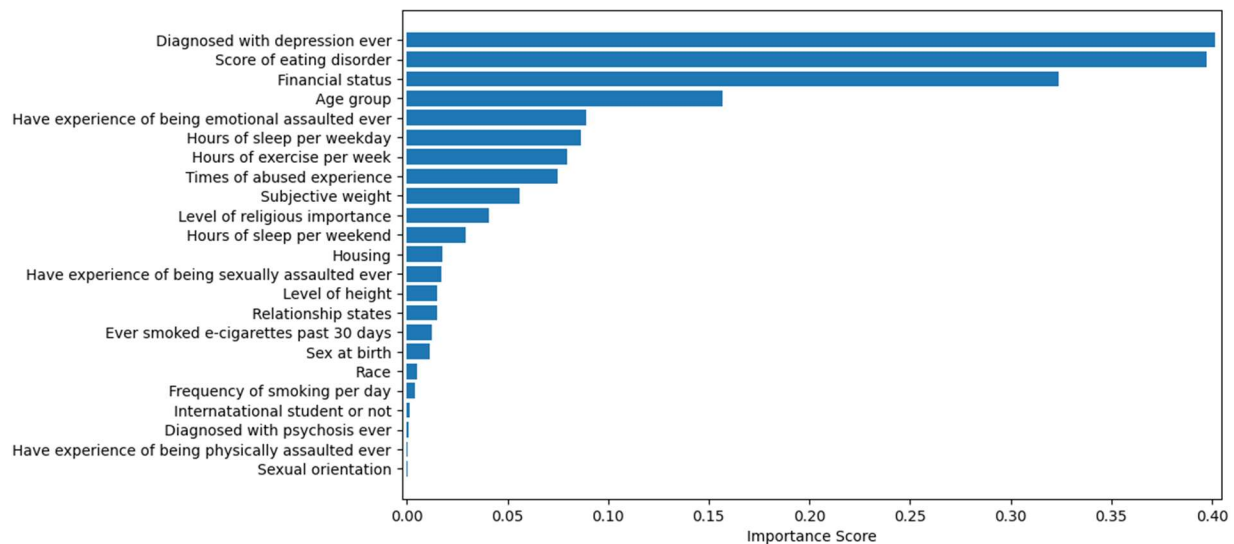

Figure 4. Permutation importance score in MAE of each predictor in sequence of binary XGBoost models.

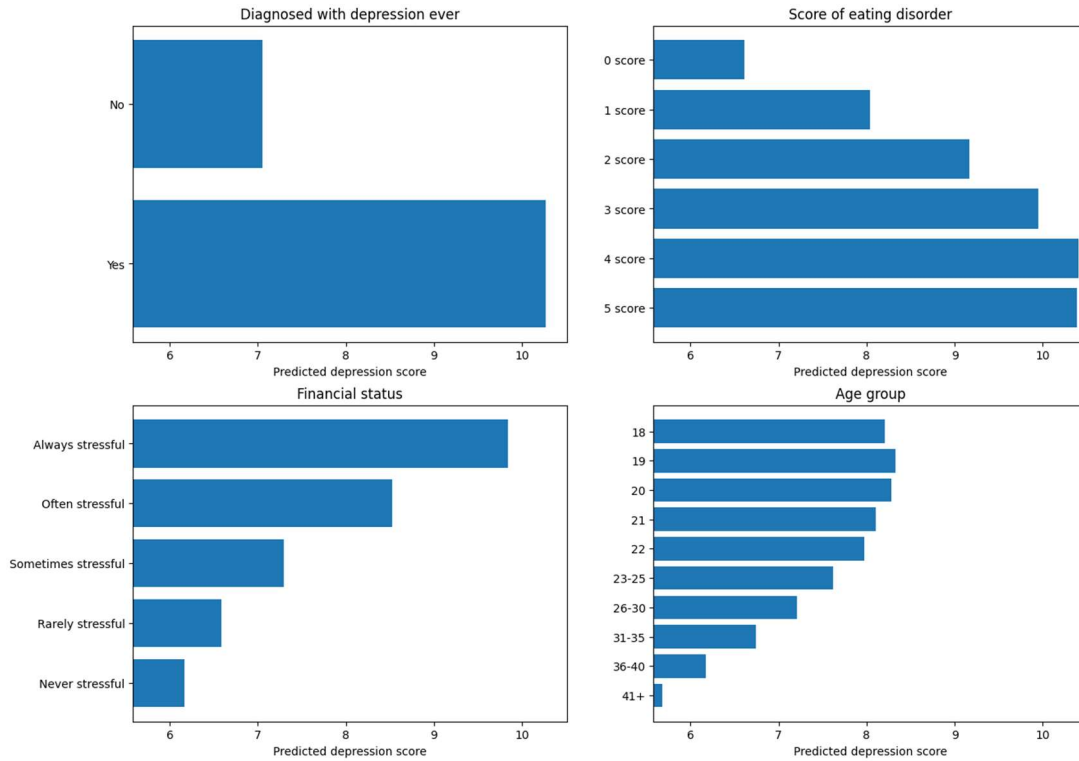

Figure 5. Partial dependence of depression history, eating disorder, financial status, and age group.

## 4. Discussion

Our study aimed to identify the key predictors of depression among US medical students, a demographic known to experience high levels of stress and mental health challenges. By exploring multiple machine learning models, we found that a sequence of binary XGBoost models performed best when predicting depression severity. The best-performing model identified several factors that most strongly predict the occurrence of depression in medical students. Using mean absolute error analysis, we were able to rank predictive factors by decreasing order of predictive power: 1. prior diagnosis of depression, 2. prior eating disorder, 3. current financial stress, 4. younger age, 5. prior experience of emotional assault, 6. current lack of sleep during the week, and 7. current lack of exercise.

Consistent with existing literature, a history of depression emerged as the strongest predictor of future depressive episodes. This finding aligns with previous research that shows

that about half of the individuals who overcome their initial episode of depression are likely to experience at least one more episode in their lifetime. This probability increases to 80% for those who have had two or more previous episodes.<sup>29</sup>

An association between disordered eating behaviors and mood disorders has been shown previously in the literature.<sup>30,31</sup> Individuals with eating disorders may experience depressive symptoms due to the psychological and physiological stressors associated with these disorders. Conversely, depression can lead to disordered eating as a coping mechanism. Our findings underscore the importance of considering the comorbidity between depression and eating disorders in medical students' holistic mental health.

Medical students often incur significant debt to finance their education and due to the high demands of medical school are unable to maintain gainful employment at the same time. This burden is disproportionately felt by students from communities Underrepresented in Medicine (URiM).<sup>32</sup> Our results highlight the role of financial stress as a predictor of depression among medical students and highlight the need for comprehensive support systems that address both the economic and psychological need of this population.

The finding between younger age and increased susceptibility to depression among medical students suggests that young students face unique challenges that predispose them to higher risks of depression in the demanding environment of higher education, a phenomenon previously noted in educational psychology research.<sup>8</sup> At the same time, it suggests that older students with more previous experience may display more resilience that helps them adapt better to the rigors of medical school.

Emotional assault, which can encompass various forms of emotional abuse and traumatic experiences, has been consistently linked in research to a heightened risk of developing mental health disorders, including depression. The significant association between the experience of emotional assault and depression in medical students found in this study

underscores the need for a trauma-informed approach in the support and care provided within medical education settings.

Sleep deprivation has a well-established link with mental health issues, particularly depression. Adequate sleep is crucial for cognitive functioning, emotional regulation, and overall psychological well-being.<sup>33</sup> In medical students, who often face irregular and extended hours due to academic and clinical responsibilities, sleep deprivation can be a significant issue. This lack of sleep can impair judgment, increase irritability, and exacerbate stress, all of which can contribute to depressive symptoms. The relationship between sleep and mental health is bidirectional; not only can poor sleep contribute to the development of mental health disorders, but existing mental health issues can further disrupt sleep patterns, creating a vicious cycle. Regular physical activity is known to have a positive impact on mental health, including depression. The absence of physical activity in the routine of medical students may leave these students more susceptible to stress and depression.<sup>34</sup>

The findings of this study hold great promise for enhancing medical education by more effectively addressing students' depression. Our predictive model may enable educators and administrators to identify students at higher risk, facilitating timely interventions and support. Mental health programs and resources tailored to meet the specific needs of students at risk can be implemented to create a healthier and more supportive learning environment.

However, the study also revealed some limitations on the data size and modeling approach. The HMS dataset spans from 2009 to 2022 and exhibits variations in the number of records and variables over this time frame. To mitigate this issue, we excluded certain predictors related to depression that were inconsistently available. Additionally, the dataset contains a very limited number of depression cases. To address this limitation, we employed controlled random sampling to balance our training data. Furthermore, our dataset encompasses various student categories, with a majority not being medical students. We addressed this shortcoming by utilizing an expanded dataset including the general population of

students (undergraduate and graduate). Bias in our model can lead to inaccurate and unfair outcomes, which can have far-reaching consequences. This work may be extended to measure and address inequitable error rates across students' social positioning or intersectionalities. Future work may focus on developing fair predictive models to account for potentially sensitive attributes and capturing potential sources of bias.

Our model can help medical practitioners predict depression scores in medical students. These scores convey intuitive information regarding the severity of medical students' depression conditions. This work also helps identify new variables that impact the severity of depression among medical students, which are not found in previous studies. Understanding the significant impact of these variables can guide medical educators and mental health professionals in developing targeted interventions.

## 5. References

1. Smith K. Mental health: A world of depression. *Nature*. 2014;515(7526):180-181. doi:10.1038/515180a
2. Puthran R, Zhang MWB, Tam WW, Ho RC. Prevalence of depression amongst medical students: a meta-analysis. *Med Educ*. 2016;50(4):456-468. doi:10.1111/medu.12962
3. Goebert D, Thompson D, Takeshita J, et al. Depressive Symptoms in Medical Students and Residents: A Multischool Study. *Acad Med*. 2009;84(2):236. doi:10.1097/ACM.0b013e31819391bb
4. Bahreini M, Hassanzade M, Akaberian S, Mirzaei K, Zaeri S. Prediction of Mental Health of students Based on their Parental Bonding. Published online 2016.
5. Liu XQ, Guo YX, Zhang WJ, Gao WJ. Influencing factors, prediction and prevention of depression in college students: A literature review. *World J Psychiatry*. 2022;12(7):860-873. doi:10.5498/wjp.v12.i7.860
6. Song SJ, Ziegler R, Arsenault L, Fried LE, Hacker K. Asian Student Depression in American High Schools: Differences in Risk Factors. *J Sch Nurs*. 2011;27(6):455-462. doi:10.1177/1059840511418670
7. Vanhalst J, Luyckx K, Teppers E, Goossens L. Disentangling the Longitudinal Relation Between Loneliness and Depressive Symptoms: Prospective Effects and the Intervening Role of Coping. *J Soc Clin Psychol*. 2012;31(8):810-834. doi:10.1521/jscp.2012.31.8.810
8. Kelifa MO, Yang Y, Carly H, Bo W, Wang P. How Adverse Childhood Experiences Relate to Subjective Wellbeing in College Students: The Role of Resilience and Depression. *J Happiness Stud*. 2021;22(5):2103-2123. doi:10.1007/s10902-020-00308-7
9. Ngin C, Pal K, Tuot S, Chhoun P, Yi R, Yi S. Social and behavioural factors associated with depressive symptoms among university students in Cambodia: a cross-sectional study. *BMJ Open*. 2018;8(9):e019918. doi:10.1136/bmjopen-2017-019918
10. Çelik N, Ceylan B, Ünsal A, Çağan Ö. Depression in health college students: relationship factors and sleep quality. *Psychol Health Med*. 2019;24(5):625-630. doi:10.1080/13548506.2018.1546881
11. Gonsalvez I, Li JJ, Stevens C, Chen JA, Liu CH. Preexisting Depression and Daytime Sleepiness in Women and Men. *Behav Sleep Med*. 2022;20(4):380-392. doi:10.1080/15402002.2021.1924720
12. Slavin SJ. Medical Student Mental Health: Culture, Environment, and the Need for Change. *JAMA*. 2016;316(21):2195-2196. doi:10.1001/jama.2016.16396
13. Explore our Data. Healthy Minds Network. Accessed September 18, 2023. <https://healthymindsnetwork.org/research/data-for-researchers/>

14. Kraskov A, Stögbauer H, Grassberger P. Estimating mutual information. *Phys Rev E*. 2004;69(6):066138. doi:10.1103/PhysRevE.69.066138
15. Chung J, Teo J. Mental Health Prediction Using Machine Learning: Taxonomy, Applications, and Challenges. *Appl Comput Intell Soft Comput*. 2022;2022:e9970363. doi:10.1155/2022/9970363
16. Cho G, Yim J, Choi Y, Ko J, Lee SH. Review of Machine Learning Algorithms for Diagnosing Mental Illness. *Psychiatry Investig*. 2019;16(4):262-269. doi:10.30773/pi.2018.12.21.2
17. Shin D, Lee KJ, Adeluwa T, Hur J. Machine Learning-Based Predictive Modeling of Postpartum Depression. *J Clin Med*. 2020;9(9):2899. doi:10.3390/jcm9092899
18. Lee C, Kim H. Machine learning-based predictive modeling of depression in hypertensive populations. *PLOS ONE*. 2022;17(7):e0272330. doi:10.1371/journal.pone.0272330
19. Lewis RJ. An Introduction to Classification and Regression Tree (CART) Analysis.
20. Chu W, Keerthi SS. Support Vector Ordinal Regression. *Neural Comput*. 2007;19(3):792-815. doi:10.1162/neco.2007.19.3.792
21. Perktold J, Skipper Seabold, Sheppard K, et al. statsmodels/statsmodels: Release 0.14.0. Published online May 5, 2023. doi:10.5281/ZENODO.593847
22. Frank E, Hall M. A Simple Approach to Ordinal Classification. In: De Raedt L, Flach P, eds. *Machine Learning: ECML 2001*. Lecture Notes in Computer Science. Springer; 2001:145-156. doi:10.1007/3-540-44795-4\_13
23. Du C, Liu C, Balamurugan P, Selvaraj P. Deep Learning-based Mental Health Monitoring Scheme for College Students Using Convolutional Neural Network. *Int J Artif Intell Tools*. 2021;30(06n08):2140014. doi:10.1142/S0218213021400145
24. Jain T, Jain A, Hada PS, Kumar H, Verma VK, Patni A. Machine Learning Techniques for Prediction of Mental Health. In: *2021 Third International Conference on Inventive Research in Computing Applications (ICIRCA)*. ; 2021:1606-1613. doi:10.1109/ICIRCA51532.2021.9545061
25. Wong TT, Yeh PY. Reliable Accuracy Estimates from k-Fold Cross Validation. *IEEE Trans Knowl Data Eng*. 2020;32(8):1586-1594. doi:10.1109/TKDE.2019.2912815
26. Altmann A, Toloşi L, Sander O, Lengauer T. Permutation importance: a corrected feature importance measure. *Bioinformatics*. 2010;26(10):1340-1347. doi:10.1093/bioinformatics/btq134
27. Cafri G, Bailey BA. Understanding Variable Effects from Black Box Prediction: Quantifying Effects in Tree Ensembles Using Partial Dependence. *J Data Sci*. 2016;14(1):67-95. doi:10.6339/JDS.201601\_14(1).0005
28. Morgan JF, Reid F, Lacey JH. The SCOFF questionnaire. *West J Med*. 2000;172(3):164-165.



29. American Psychiatric Association. Diagnostic and Statistical Manual of Mental Disorders, 4th ed. (DSM-IV). *Am J Psychiatry*. 1995;152(8):1228-1228. doi:10.1176/ajp.152.8.1228
30. Godart N, Radon L, Curt F, et al. Mood disorders in eating disorder patients: Prevalence and chronology of ONSET. *J Affect Disord*. 2015;185:115-122. doi:10.1016/j.jad.2015.06.039
31. Turner H, Marshall E, Wood F, Stopa L, Waller G. CBT for eating disorders: The impact of early changes in eating pathology on later changes in personality pathology, anxiety and depression. *Behav Res Ther*. 2016;77:1-6. doi:10.1016/j.brat.2015.11.011
32. Roche R, Manzi J, Baker S, Ndubuizu T. Under-represented minority students and identification of obstacles to a career in medicine. *Clin Teach*. 2021;18(2):186-190. doi:10.1111/tct.13312
33. Alhola P, Polo-Kantola P. Sleep deprivation: Impact on cognitive performance. *Neuropsychiatr Dis Treat*. 2007;3(5):553-567.
34. Mikkelsen K, Stojanovska L, Polenakovic M, Bosevski M, Apostolopoulos V. Exercise and mental health. *Maturitas*. 2017;106:48-56. doi:10.1016/j.maturitas.2017.09.003

## 6. Appendix

### 6.1 Supplemental Figures

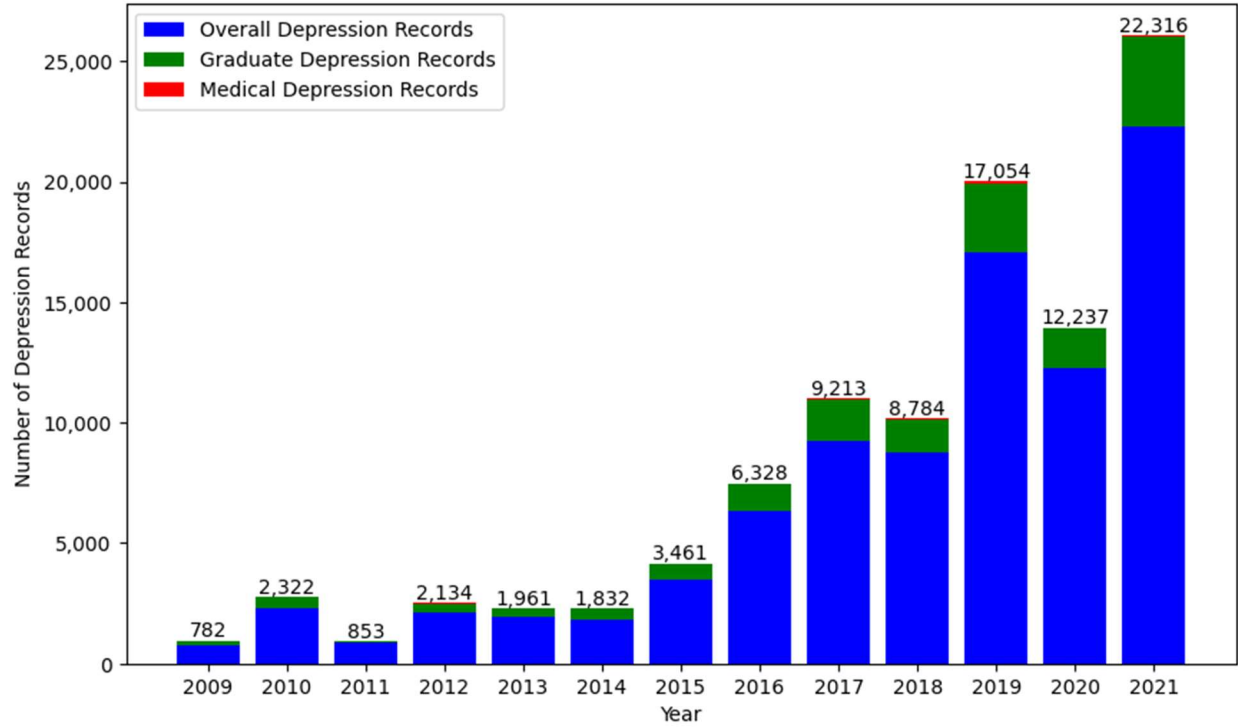

Supplemental Figure 1. Number of depression records included in different years.

It is made available under a [CC-BY-ND 4.0 International license](https://creativecommons.org/licenses/by-nd/4.0/) .

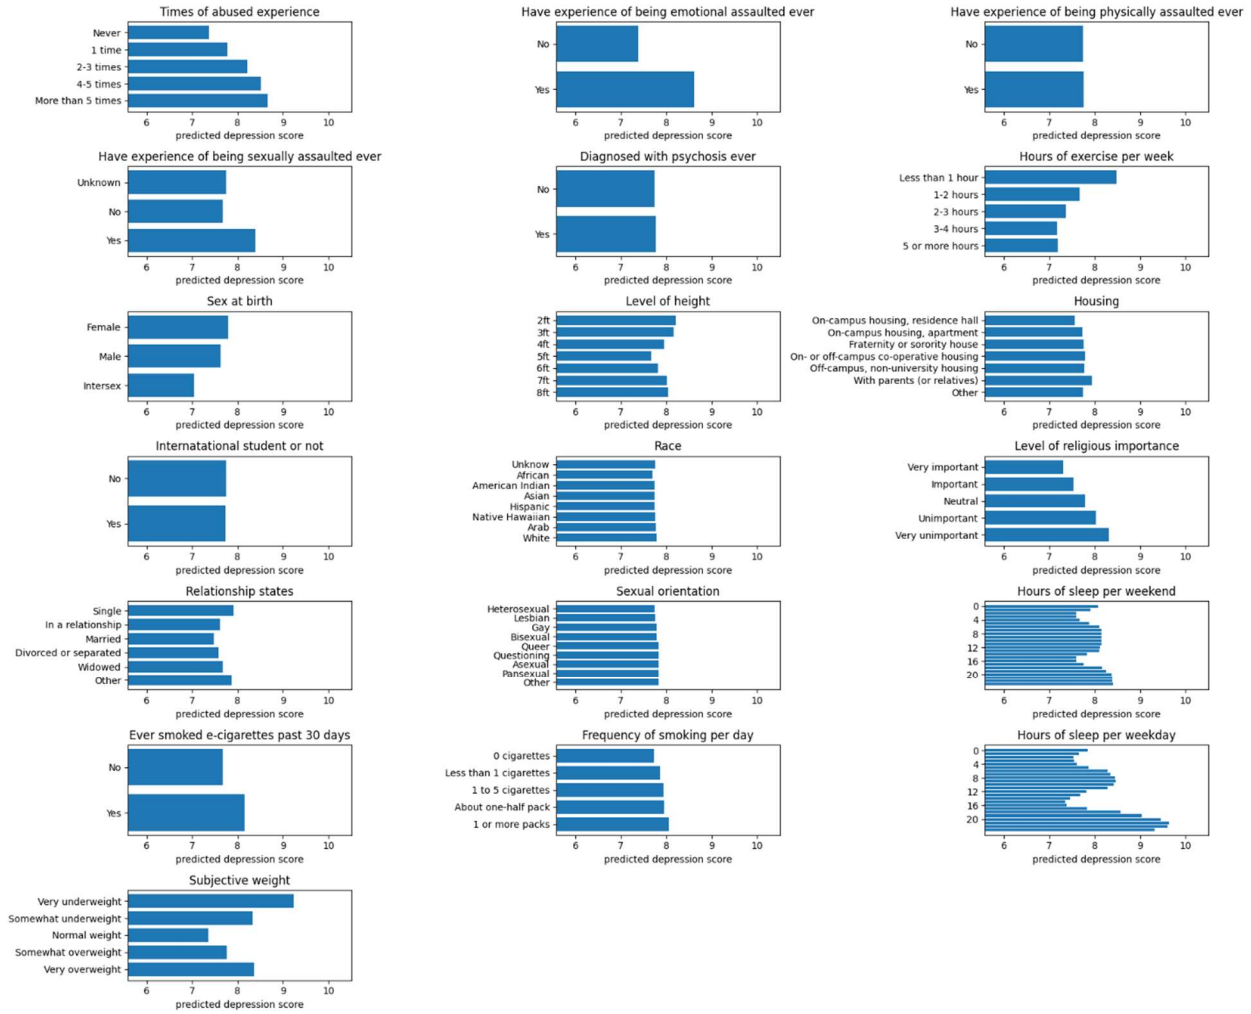

Supplemental Figure 2. Partial dependence plot for rest variables in sequence of binary XGBoost models.

## 6.2 Supplemental Tables

Supplemental Table 1. Selected variables with their meanings and scores.

| Demographic variables |                                   |                          |
|-----------------------|-----------------------------------|--------------------------|
| Variable name         | Meaning                           | Mutual Information Score |
| age                   | Level of age                      | 0.060806                 |
| sex_birth             | Sex at birth                      | 0.059762                 |
| race_black            | Race: African American            | 0.068075                 |
| race_ainaan           | Race: American Indian             | 0.079659                 |
| race_asian            | Race: Asian                       | 0.038503                 |
| race_his              | Race: Hispanic                    | 0.061001                 |
| race_pi               | Race: Native Hawaiian             | 0.062572                 |
| race_mides            | Race: Middle Eastern              | 0.029515                 |
| race_white            | Race: White                       | 0.073291                 |
| international         | International student             | 0.007698                 |
| fincur                | Financial status                  | 0.112953                 |
| relship               | Relationship status               | 0.006771                 |
| sexual_h              | Sexual orientation: Heterosexual  | 0.005165                 |
| sexual_l              | Sexual orientation: Lesbian       | 0.041546                 |
| sexual_g              | Sexual orientation: Gay           | 0.031767                 |
| sexual_bi             | Sexual orientation: Bisexual      | 0.022946                 |
| sexual_queer          | Sexual orientation: Queer         | 0.018342                 |
| sexual_quest          | Sexual orientation: Questioning   | 0.016848                 |
| sexual_other          | Sexual orientation: Self-identify | 0.009148                 |
| religios              | Level of religious importance     | 0.071104                 |
| height_ft             | Level of height                   | 0.149735                 |

| Mutual information criterion variables |                                                                           |          |
|----------------------------------------|---------------------------------------------------------------------------|----------|
| Variable name                          | Meaning                                                                   | Score    |
| dx_psy                                 | Diagnosed with psychosis ever                                             | 0.337642 |
| lone_isolated                          | Frequency of feeling isolated currently                                   | 0.262182 |
| smok_vape                              | Use of electronic cigarette or vape pen ever                              | 0.198321 |
| talk1_6                                | Prefer to seek emotional help from religion                               | 0.194991 |
| smok_freq                              | Smoking frequency (in 30 days) level                                      | 0.181191 |
| sa_exp                                 | Have experience of being sexually assaulted ever                          | 0.170068 |
| Q3_22                                  | Times of heavy drinking in 2 weeks                                        | 0.163248 |
| drug_coc                               | Use of cocaine in 30 days                                                 | 0.161053 |
| exerc                                  | Hours of exercise per week                                                | 0.158574 |
| body_sr                                | Ever worry about weight                                                   | 0.155654 |
| assault_phys                           | Have experience of being physically assaulted ever since coming to school | 0.151466 |
| ed_scoff                               | Eating disorder (0-5 SCOFF score)                                         | 0.142633 |
| adjust_aca_1                           | Academic adjustments in college                                           | 0.139382 |
| birthcontrol_3                         | Use of contraceptive pills in 30                                          | 0.129280 |

|               |                                                                         |               |
|---------------|-------------------------------------------------------------------------|---------------|
|               | days                                                                    |               |
| abuse_life    | Times of abused experience                                              | 0.114874      |
| assault_emo   | Have experience of being sexually assaulted ever since coming to school | 0.118799      |
| sleep_wknight | Sleep time in weekdays                                                  | 0.1098-0.1095 |

Supplemental Table 2. Detail of selected variables

| Value                        | Count  | Percentage |
|------------------------------|--------|------------|
| Degree of depression (Score) |        |            |
| 0                            | 28,644 | 5.91%      |
| 1                            | 25,471 | 5.26%      |
| 2                            | 36,952 | 7.62%      |
| 3                            | 39,382 | 8.13%      |
| 4                            | 37,782 | 7.80%      |
| 5                            | 35,368 | 7.30%      |
| 6                            | 33,258 | 6.86%      |
| 7                            | 31,439 | 6.49%      |
| 8                            | 28,594 | 5.90%      |
| 9                            | 26,176 | 5.40%      |
| 10                           | 21,388 | 4.41%      |
| 11                           | 18,750 | 3.87%      |
| 12                           | 16,722 | 3.45%      |
| 13                           | 14,902 | 3.07%      |
| 14                           | 13,397 | 2.76%      |
| 15                           | 11,819 | 2.44%      |
| 16                           | 10,767 | 2.22%      |
| 17                           | 9,080  | 1.87%      |
| 18                           | 8,542  | 1.76%      |
| 19                           | 6,703  | 1.38%      |
| 20                           | 5,734  | 1.18%      |
| 21                           | 5,297  | 1.09%      |
| 22                           | 4,374  | 0.90%      |
| 23                           | 3,716  | 0.77%      |

|                                      |            |        |
|--------------------------------------|------------|--------|
| 24                                   | 3,613      | 0.75%  |
| 25                                   | 2,489      | 0.51%  |
| 26                                   | 1,548      | 0.32%  |
| 27                                   | 2,746      | 0.57%  |
| Eating disorder (SCOFF Score)        |            |        |
| 0                                    | 203,763    | 50.45% |
| 1                                    | 94,877     | 23.50% |
| 2                                    | 59,537     | 14.75% |
| 3                                    | 31,604     | 7.83%  |
| 4                                    | 11,398     | 2.82%  |
| 5                                    | 2,411      | 0.59%  |
| Ever been abused                     |            |        |
| Never                                | 194,346    | 56.41% |
| 1 time                               | 29,720     | 8.62%  |
| 2-3 times                            | 54,772     | 15.89% |
| 4-5 times                            | 16,366     | 4.75%  |
| More than 5 times                    | 49,301     | 14.31% |
| Age group                            |            |        |
| 18                                   | 57,025     | 11.77% |
| 19                                   | 74,176     | 15.30% |
| 20                                   | 73,069     | 15.08% |
| 21                                   | 70,530     | 14.55% |
| 22                                   | 44,253     | 9.13%  |
| 23-25                                | 62,964     | 12.99% |
| 26-30                                | 52,101     | 10.75% |
| 31-35                                | 21,403     | 4.42%  |
| 36-40                                | 11,215     | 2.31%  |
| 41+                                  | 17,875     | 3.69%  |
| Ever emotionally assaulted past year |            |        |
| No                                   | 227,706.00 | 66.44% |
| Yes                                  | 82,619.00  | 33.55% |
| Ever physically assaulted past year  |            |        |
| No                                   | 292,463.00 | 73.37% |
| Yes                                  | 17,664.00  | 26.62% |
| Ever sexually assaulted past year    |            |        |
| Unknow                               | 257,727.00 | 53.18% |
| No                                   | 205,485.00 | 42.40% |
| Yes                                  | 21,441.00  | 4.42%  |
| Medical student or not               |            |        |
| No                                   | 100,972.00 | 98.38% |

|                                        |            |        |
|----------------------------------------|------------|--------|
| Yes                                    | 5,324.00   | 1.61%  |
| Ever psychosis                         |            |        |
| No                                     | 254,734.00 | 99.34% |
| Yes                                    | 1,657.00   | 0.64%  |
| Exercise hour per week                 |            |        |
| Less than 1 hour                       | 97,277     | 27.44% |
| 1-2 hours                              | 83,192     | 23.36% |
| 2-3 hours                              | 65,325     | 18.26% |
| 3-4 hours                              | 93,727     | 26.38% |
| 5 or more hours                        | 15,888     | 4.54%  |
| Financial status                       |            |        |
| Always stressful                       | 49,626     | 10.24% |
| Often stressful                        | 105,801    | 21.83% |
| Sometimes stressful                    | 198,958    | 41.05% |
| Rarely stressful                       | 104,152    | 21.49% |
| Never stressful                        | 23,215     | 4.79%  |
| Gender                                 |            |        |
| Female                                 | 324,283.00 | 67.04% |
| Male                                   | 159,406.00 | 32.86% |
| Intersex                               | 440        | 0.09%  |
| Graduate student or not                |            |        |
| No                                     | 299,500.00 | 61.80% |
| Yes                                    | 185,153.00 | 38.20% |
| Level of height                        |            |        |
| 1 ft                                   | 1,497.00   | 0.34%  |
| 2 ft                                   | 5,449.00   | 1.24%  |
| 3 ft                                   | 7,058.00   | 1.61%  |
| 4 ft                                   | 12,807.00  | 2.92%  |
| 5 ft                                   | 342,705.00 | 78.31% |
| 6 ft                                   | 54,898.00  | 12.54% |
| 7 ft                                   | 6,993.00   | 1.59%  |
| 8 ft                                   | 6,179.00   | 1.51%  |
| Housing                                |            |        |
| On-campus housing, residence hall      | 127,933    | 26.72% |
| On-campus housing, apartment           | 28,613     | 5.97%  |
| Fraternity or sorority house           | 8,493      | 1.77%  |
| On- or off-campus co-operative housing | 52,320     | 10.93% |



|                                       |            |        |
|---------------------------------------|------------|--------|
| Off-campus, non-university housing    | 178,256    | 37.24% |
| With parents (or relatives)           | 72,383     | 15.12% |
| Other                                 | 10,634     | 2.221% |
| International student or not          |            |        |
| No                                    | 417,401.00 | 92.26% |
| Yes                                   | 35,043.00  | 7.74%  |
| Race                                  |            |        |
| Unknow                                | 296,656.00 | 61.21% |
| African                               | 36,981.00  | 7.63%  |
| American Indian                       | 4,841.00   | 1.00%  |
| Asian                                 | 52,841.00  | 10.90% |
| Hispanic                              | 40,826.00  | 8.42%  |
| Native Hawaiian                       | 230        | 0.05%  |
| Arab                                  | 1,385.00   | 0.29%  |
| White                                 | 50,893.00  | 10.50% |
| Religious                             |            |        |
| Very important                        | 70,871.00  | 14.62% |
| Important                             | 90,824.00  | 18.74% |
| Neutral                               | 126,699.00 | 26.14% |
| Unimportant                           | 102,067.00 | 21.06% |
| Very unimportant                      | 93,656.00  | 19.32% |
| Relationship states                   |            |        |
| Single                                | 241,960.00 | 49.92% |
| In a relationship                     | 175,551.00 | 36.22% |
| Married                               | 58,953.00  | 12.16% |
| Divorced or separated                 | 4,077.00   | 0.84%  |
| Widowed                               | 496        | 0.10%  |
| Other                                 | 3,260.00   | 0.67%  |
| Sexual orientation                    |            |        |
| Heterosexual                          | 393,391.00 | 92.91% |
| Lesbian                               | 2,586.00   | 0.61%  |
| Gay                                   | 1,936.00   | 0.46%  |
| Bisexual                              | 16,673.00  | 3.96%  |
| Queer                                 | 2,381.00   | 0.57%  |
| Questioning                           | 3,082.00   | 0.73%  |
| Asexual                               | 1,169.00   | 0.27%  |
| Pansexual                             | 1,848.00   | 0.44%  |
| Other                                 | 31         | 0.01%  |
| Ever smoked e-cigarettes past 30 days |            |        |

It is made available under a [CC-BY-ND 4.0 International license](https://creativecommons.org/licenses/by-nd/4.0/) .

|                              |            |        |
|------------------------------|------------|--------|
| No                           | 204,121.00 | 84.80% |
| Yes                          | 36,568.00  | 71519% |
| Frequency of smoking per day |            |        |
| 0 cigarettes                 | 327,789.00 | 92.16% |
| Less than 1 cigarettes       | 12,525.00  | 3.52%  |
| 1 to 5 cigarettes            | 9,054.00   | 2.54%  |
| About one-half pack          | 3,471.00   | 0.97%  |
| 1 or more packs              | 2,801.00   | 0.78%  |
| Hours of weekday sleeping    |            |        |
| 0                            | 2,450.00   | 0.58%  |
| 1                            | 1,265.00   | 0.30%  |
| 2                            | 4,692.00   | 1.11%  |
| 3                            | 13,977.00  | 3.31%  |
| 4                            | 23,006.00  | 5.45%  |
| 5                            | 23,477.00  | 5.57%  |
| 6                            | 27,080.00  | 6.42%  |
| 7                            | 26,657.00  | 6.32%  |
| 8                            | 15,256.00  | 3.62%  |
| 9                            | 2,840.00   | 0.67%  |
| 10                           | 973        | 0.23%  |
| 11                           | 407        | 0.09%  |
| 12                           | 1,454.00   | 0.34%  |
| 13                           | 4,484.00   | 1.06%  |
| 14                           | 19,403.00  | 4.60%  |
| 15                           | 55,881.00  | 13.25% |
| 16                           | 84,790.00  | 20.11% |
| 17                           | 62,788.00  | 14.89% |
| 18                           | 31,239.00  | 7.41%  |
| 19                           | 12,310.00  | 2.92%  |
| 20                           | 4,799.00   | 1.13%  |
| 21                           | 1,377.00   | 0.32%  |
| 22                           | 458        | 0.10%  |
| 23                           | 366        | 0.08%  |
| Subjective weight            |            |        |
| Very underweight             | 4,053.00   | 1.07%  |
| Somewhat underweight         | 32,615.00  | 8.66%  |
| Normal weight                | 165,988.00 | 44.11% |
| Somewhat overweight          | 135,192.00 | 35.93% |
| Very overweight              | 38,410.00  | 10.20% |
| Year that data was recorded  |            |        |

|      |          |        |
|------|----------|--------|
| 2009 | 8,099.0  | 1.67%  |
| 2010 | 22,802.0 | 4.70%  |
| 2011 | 8,697.0  | 1.79%  |
| 2012 | 23,409.0 | 4.83%  |
| 2013 | 17,744.0 | 3.66%  |
| 2014 | 16,056.0 | 3.31%  |
| 2015 | 30,319.0 | 6.26%  |
| 2016 | 41,358.0 | 8.53%  |
| 2017 | 50,118.0 | 10.34% |
| 2018 | 44,879.0 | 9.26%  |
| 2019 | 82,533.0 | 17.03% |
| 2020 | 47,655.0 | 9.83%  |
| 2021 | 85,391.0 | 17.62% |

Supplemental Table 3. P-values of Wilcoxon Rank-Sum Tests with Bonferroni Correction of the multi-class models. Values are shown using an upper triangular representation for simplicity purposes. P-values smaller than 0.001 are represented by dashes.

| Model                             | Sequence of binary XGBoost models | Ordinal logistic regression | Support vector ordinal regression | multinomial logistic regression | Sequence of neural network models |
|-----------------------------------|-----------------------------------|-----------------------------|-----------------------------------|---------------------------------|-----------------------------------|
| Sequence of binary XGBoost models | 1                                 | 0.008                       | -                                 | -                               | -                                 |
| Ordinal logistic regression       |                                   | 1                           | -                                 | -                               | -                                 |
| Support vector ordinal regression |                                   |                             | 1                                 | -                               | -                                 |
| multinomial logistic regression   |                                   |                             |                                   | 1                               | -                                 |
| Sequence of neural network models |                                   |                             |                                   |                                 | 1                                 |
